# Supplementary material for: Physical fitness and physical activity of 6-7-year-old children according to weight status and sports participation
Source: PubMed Central journal article supplement (PMC6592557; doi:10.1371/journal.pone.0218901), 2019-06-25
Supplement: pone.0218901.s001.pdf [file pone.0218901.s001.pdf]

| Subject | Age | Gender | SEDday | MPAday   | LPAday   | VPAday    | MVPAday  | MVPAnorm |   |
|---------|-----|--------|--------|----------|----------|-----------|----------|----------|---|
| 001     |     | 7      | 2 -    | -        | -        | -         | -        | -        |   |
| 2       |     | 6      | 1 -    | -        | -        | -         | -        | -        |   |
| 003     |     | 7      | 2 -    | -        | -        | -         | -        | -        |   |
| 004     |     | 7      | 1      | 698,9286 | 37,71429 | 337,46429 | 12,53571 | 50,25    | 2 |
| 5       |     | 7      | 2 -    | -        | -        | -         | -        | -        |   |
| 006     |     | 6      | 1      | 561,8214 | 86,03571 | 372,32143 | 44,28571 | 130,321  | 1 |
| 007     |     | 6      | 1      | 343,2917 | 81,33333 | 350,5     | 33       | 114,333  | 1 |
| 008     |     | 6      | 1 -    | -        | -        | -         | -        | -        |   |
| 009     |     | 7      | 1      | 419,5357 | 32,17857 | 265,71429 | 30,42857 | 62,607   | 1 |
| 010     |     | 6      | 2      | 324,05   | 55,05    | 332,15    | 33,3     | 88,35    | 1 |
| 011     |     | 7      | 2      | 504,8    | 25,65    | 190,7     | 7,35     | 33       | 2 |
| 012     |     | 7      | 2      | 372,0833 | 33,95833 | 291,95833 | 12,5     | 46,458   | 2 |
| 013     |     | 6      | 1      | 388,7143 | 44       | 361,39286 | 11,85714 | 55,857   | 2 |
| 014     |     | 7      | 1      | 335,2143 | 47,60714 | 368,07143 | 13,82143 | 61,429   | 1 |
| 015     |     | 7      | 1      | 361,6    | 64,7     | 351,65    | 26,6     | 91,3     | 1 |
| 016     |     | 6      | 1      | 304,2083 | 93       | 334,79167 | 56,33333 | 149,333  | 1 |
| 017     |     | 6      | 1      | 356,65   | 41,35    | 247,15    | 12,4     | 53,75    | 2 |
| 018     |     | 7      | 1      | 430,9583 | 39,66667 | 214,33333 | 16,79167 | 56,458   | 2 |
| 019     |     | 6      | 1      | 380,1786 | 49,82143 | 355,17857 | 12,46429 | 62,286   | 1 |
| 020     |     | 6      | 2      | 340,1667 | 45,41667 | 263,20833 | 17,70833 | 63,125   | 1 |
| 021     |     | 7      | 1 -    | -        | -        | -         | -        | -        |   |
| 022     |     | 6      | 2      | 332,6786 | 49,57143 | 309,5     | 31,92857 | 81,5     | 1 |
| 023     |     | 7      | 1      | 490,8571 | 37,67857 | 263       | 17,67857 | 55,357   | 2 |
| 024     |     | 6      | 2      | 327      | 62,7     | 316,7     | 27,75    | 90,45    | 1 |
| 025     |     | 7      | 1      | 512,75   | 38,67857 | 248,78571 | 20,64286 | 59,321   | 2 |
| 026     |     | 6      | 2      | 383,0625 | 39,25    | 246,9375  | 29,875   | 69,125   | 1 |
| 027     |     | 6      | 1      | 429,1071 | 56,28571 | 350,85714 | 27,75    | 84,036   | 1 |
| 028     |     | 7      | 1      | 318,9643 | 71,28571 | 276,46429 | 59,67857 | 130,964  | 1 |
| 029     |     | 6      | 2      | 570,5357 | 64,17857 | 404       | 12,28571 | 76,464   | 1 |
| 030     |     | 6      | 1      | 334,8571 | 32,21429 | 320,17857 | 7,714286 | 39,929   | 2 |
| 031     |     | 7      | 1      | 393,5714 | 44,71429 | 283       | 13,07143 | 57,786   | 2 |
| 032     |     | 7      | 2      | 395,5357 | 30,32143 | 278,89286 | 12,75    | 43,071   | 2 |
| 033     |     | 7      | 2      | 575,4286 | 73,46429 | 393,42857 | 31,53571 | 105      | 1 |
| 034     |     | 7      | 2      | 386,1786 | 43,57143 | 302,60714 | 14,5     | 58,071   | 2 |
| 035     |     | 7      | 1      | 380,9286 | 44       | 310,92857 | 19,57143 | 63,571   | 1 |
| 036     |     | 7      | 2      | 385,8929 | 39,25    | 285,64286 | 19,35714 | 58,607   | 2 |
| 037     |     | 6      | 1      | 444,9286 | 53,17857 | 237,67857 | 27,17857 | 80,357   | 1 |
| 038     |     | 6      | 2      | 391,9167 | 37,75    | 280,08333 | 14,79167 | 52,542   | 2 |
| 039     |     | 6      | 1      | 366,45   | 46,5     | 354,6     | 15,2     | 61,7     | 1 |
| 040     |     | 7      | 2      | 297,25   | 56,625   | 300,5     | 12,625   | 69,25    | 1 |
| 041     |     | 6      | 1      | 420,375  | 33,16667 | 286,83333 | 19,70833 | 52,875   | 2 |
| 042     |     | 6      | 2      | 335,7857 | 38,35714 | 308,35714 | 9,607143 | 47,964   | 2 |
| 043     |     | 7      | 1      | 399,6071 | 56,14286 | 315,35714 | 17,14286 | 73,286   | 1 |
| 044     |     | 7      | 1      | 382,35   | 69,35    | 331,95    | 22,45    | 91,8     | 1 |
| 045     |     | 6      | 2      | 521,7857 | 29,78571 | 286,25    | 16,17857 | 45,964   | 2 |
| 046     |     | 7      | 2      | 485,5357 | 44,92857 | 286,25    | 27,28571 | 72,214   | 1 |
| 47      |     | 7      | 1 -    | -        | -        | -         | -        | -        |   |
| 48      |     | 7      | 2 -    | -        | -        | -         | -        | -        |   |
| 49      |     | 6      | 2 -    | -        | -        | -         | -        | -        |   |

|     |   |   |          |          |           |          |        |   |   |
|-----|---|---|----------|----------|-----------|----------|--------|---|---|
| 50  | 7 | 2 | -        | -        | -         | -        | -      | - | - |
| 51  | 6 | 1 | -        | -        | -         | -        | -      | - | - |
| 052 | 6 | 2 | -        | -        | -         | -        | -      | - | - |
| 053 | 6 | 1 | -        | -        | -         | -        | -      | - | - |
| 054 | - | - | 314,8929 | 52,21429 | 267,46429 | 28,60714 | 80,821 |   | 1 |
| 55  | 7 | 1 | -        | -        | -         | -        | -      | - | - |
| 056 | 6 | 2 | 383,55   | 58,5     | 323,65    | 16,7     | 75,2   |   | 1 |
| 057 | 6 | 2 | 381,9643 | 51,71429 | 263,35714 | 28,14286 | 79,857 |   | 1 |
| 058 | 7 | 1 | 383,6071 | 48,25    | 331       | 14,46429 | 62,714 |   | 1 |
| 059 | 7 | 2 | 413,6429 | 44,28571 | 345,39286 | 17,67857 | 61,964 |   | 1 |
| 060 | 6 | 2 | 399,4167 | 34,45833 | 285,33333 | 8,125    | 42,583 |   | 2 |
| 061 | 6 | 1 | 390,625  | 62,04167 | 323,25    | 24,41667 | 86,458 |   | 1 |
| 062 | 7 | 1 | 431,375  | 33,45833 | 288,16667 | 8,708333 | 42,167 |   | 2 |
| 063 | 7 | 1 | 422      | 47,25    | 321,41667 | 12,70833 | 59,958 |   | 2 |
| 64  | - | - | -        | -        | -         | -        | -      | - | - |
| 065 | 6 | 2 | -        | -        | -         | -        | -      | - | - |
| 066 | 7 | 1 | 344,75   | 42,83333 | 284,08333 | 18       | 60,833 |   | 1 |
| 067 | 7 | 1 | 371,15   | 49,2     | 279,25    | 18,5     | 67,7   |   | 1 |
| 068 | 7 | 1 | 390      | 47,17857 | 323,89286 | 15,92857 | 63,107 |   | 1 |
| 069 | 7 | 2 | 393,6071 | 34,10714 | 288,10714 | 10,64286 | 44,75  |   | 2 |
| 070 | 7 | 2 | 404,5833 | 31,875   | 316,125   | 10,375   | 42,25  |   | 2 |
| 71  | - | - | -        | -        | -         | -        | -      | - | - |
| 072 | 7 | 2 | -        | -        | -         | -        | -      | - | - |
| 073 | 6 | 2 | -        | -        | -         | -        | -      | - | - |
| 074 | 6 | 2 | 446,125  | 31       | 258,66667 | 13,83333 | 44,833 |   | 2 |
| 075 | 7 | 1 | 406,8333 | 47,95833 | 274,5     | 21,20833 | 69,167 |   | 1 |
| 76  | - | - | -        | -        | -         | -        | -      | - | - |
| 77  | 7 | 2 | -        | -        | -         | -        | -      | - | - |
| 078 | 7 | 2 | 356,65   | 56,3     | 363,55    | 19,65    | 75,95  |   | 1 |
| 079 | 7 | 1 | 385,9    | 53,075   | 331,45    | 29,8     | 82,875 |   | 1 |
| 80  | 7 | 1 | -        | -        | -         | -        | -      | - | - |
| 081 | 7 | 1 | 416,75   | 23,15    | 261,15    | 2,7      | 25,85  |   | 2 |
| 082 | 7 | 1 | 389,7    | 73,2     | 333,7     | 33,15    | 106,35 |   | 1 |
| 083 | 7 | 1 | 318,2    | 50,45    | 331,15    | 7,75     | 58,2   |   | 2 |
| 084 | 6 | 2 | 463,1    | 50,15    | 340,6     | 23,25    | 73,4   |   | 1 |
| 085 | 7 | 1 | 404,65   | 38,85    | 248,05    | 16,4     | 55,25  |   | 2 |
| 086 | 7 | 1 | 362,05   | 52,7     | 287,95    | 18,5     | 71,2   |   | 1 |
| 087 | 7 | 1 | 274,0833 | 70,58333 | 354,41667 | 27,58333 | 98,167 |   | 1 |
| 88  | 7 | 1 | -        | -        | -         | -        | -      | - | - |
| 089 | 7 | 2 | 384,85   | 29,3     | 270,2     | 7,5      | 36,8   |   | 2 |
| 90  | 7 | 2 | -        | -        | -         | -        | -      | - | - |
| 091 | 6 | 1 | 360,5    | 43,5625  | 291,5     | 15,8125  | 59,375 |   | 2 |
| 92  | 7 | 1 | -        | -        | -         | -        | -      | - | - |
| 93  | 6 | 1 | -        | -        | -         | -        | -      | - | - |
| 094 | 6 | 1 | 305,1    | 62,75    | 338,15    | 30,7     | 93,45  |   | 1 |
| 95  | 6 | 1 | -        | -        | -         | -        | -      | - | - |
| 96  | 6 | 2 | -        | -        | -         | -        | -      | - | - |
| 97  | 6 | 2 | -        | -        | -         | -        | -      | - | - |
| 098 | 6 | 1 | 414,4583 | 35,625   | 222,04167 | 15,20833 | 50,833 |   | 2 |
| 099 | 6 | 1 | 395,1875 | 39,875   | 286,0625  | 11,4375  | 51,313 |   | 2 |

|     |   |   |          |          |           |          |         |   |
|-----|---|---|----------|----------|-----------|----------|---------|---|
| 100 | 7 | 1 | 426,25   | 36,60714 | 298,71429 | 15,32143 | 51,929  | 2 |
| 101 | 7 | 1 | -        | -        | -         | -        | 0       | 2 |
| 102 | 7 | 2 | 510,0833 | 28,75    | 234,08333 | 23,29167 | 52,042  | 2 |
| 103 | 7 | 1 | 631,2143 | 44,96429 | 370,60714 | 14,39286 | 59,357  | 2 |
| 104 | 7 | 1 | -        | -        | -         | -        | -       | - |
| 105 | 6 | 1 | 349      | 98,58333 | 383,04167 | 47,875   | 146,458 | 1 |
| 106 | 7 | 2 | 485,75   | 37,33333 | 280,75    | 12,41667 | 49,75   | 2 |
| 107 | 7 | 2 | 504,5833 | 40       | 281,54167 | 13,08333 | 53,083  | 2 |
| 108 | 7 | 1 | 339,4583 | 53,04167 | 328,375   | 16,5     | 69,542  | 1 |
| 109 | 7 | 1 | 356,3571 | 53,35714 | 261,53571 | 24,25    | 77,607  | 1 |
| 110 | 7 | 1 | 415,6    | 47,4     | 308,8     | 15,85    | 63,25   | 1 |
| 111 | 6 | 2 | 426,5833 | 39,79167 | 228,54167 | 16,91667 | 56,708  | 2 |
| 112 | 6 | 1 | 335,2083 | 51,375   | 366,08333 | 13,79167 | 65,167  | 1 |
| 113 | 7 | 1 | 372,875  | 39       | 301,83333 | 12,04167 | 51,042  | 2 |
| 114 | 7 | 2 | 452,9583 | 35,66667 | 212,125   | 25,83333 | 61,5    | 1 |
| 115 | 6 | 2 | -        | -        | -         | -        | -       | - |
| 116 | 7 | 2 | 373,85   | 40,05    | 300       | 10,2     | 50,25   | 2 |
| 117 | 7 | 1 | 390,4643 | 83,67857 | 309,67857 | 54,46429 | 138,143 | 1 |
| 118 | 7 | 1 | 336,5    | 52,33333 | 307,75    | 20,5     | 72,833  | 1 |
| 119 | 7 | 1 | 412,3125 | 43,25    | 259,6875  | 41,0625  | 84,313  | 1 |
| 120 | 7 | 2 | 444      | 28,55    | 262,7     | 14,5     | 43,05   | 2 |
| 121 | 6 | 2 | 337,9583 | 38       | 327,75    | 12,95833 | 50,958  | 2 |
| 122 | - | - | -        | -        | -         | -        | -       | - |
| 123 | 6 | 2 | 426,25   | 33,66667 | 266,70833 | 11,875   | 45,542  | 2 |
| 124 | 7 | 2 | 309,65   | 59,35    | 298,8     | 23,25    | 82,6    | 1 |
| 125 | 7 | 2 | -        | -        | -         | -        | 0       | 2 |
| 126 | 7 | 2 | 383,7083 | 60,16667 | 286,66667 | 25,66667 | 85,833  | 1 |
| 127 | - | - | -        | -        | -         | -        | -       | - |
| 128 | 6 | 2 | 406,45   | 29,1     | 257,7     | 10,75    | 39,85   | 2 |
| 129 | 7 | 1 | 354,5833 | 54,20833 | 375,54167 | 15,45833 | 69,667  | 1 |
| 130 | 7 | 1 | 367,0833 | 74,125   | 352,41667 | 22,16667 | 96,292  | 1 |
| 131 | 7 | 1 | 360,7    | 45,7     | 350,5     | 14,45    | 60,15   | 1 |
| 132 | 6 | 2 | 403,1071 | 37,67857 | 286,03571 | 9,107143 | 46,786  | 2 |
| 133 | 7 | 1 | 406,75   | 28,14286 | 315,96429 | 6,785714 | 34,929  | 2 |
| 134 | 6 | 2 | 341,2857 | 33,35714 | 360,57143 | 11,78571 | 45,143  | 2 |
| 135 | 7 | 1 | 352,7917 | 52,58333 | 343       | 22,58333 | 75,167  | 1 |
| 136 | 8 | 2 | 603,3333 | 41,45833 | 278,41667 | 38,83333 | 80,292  | 1 |
| 137 | 7 | 2 | -        | -        | -         | -        | -       | - |
| 138 | 7 | 1 | 380,5833 | 37,375   | 301,125   | 13,04167 | 50,417  | 2 |
| 139 | 6 | 2 | 356,9286 | 51,67857 | 275,71429 | 25,64286 | 77,321  | 1 |
| 140 | 7 | 2 | 397,125  | 48,625   | 239,125   | 22,125   | 70,75   | 1 |
| 141 | 7 | 1 | 402,6786 | 47,85714 | 299,57143 | 14,89286 | 62,75   | 1 |
| 142 | 7 | 2 | 440,2143 | 41,71429 | 283,53571 | 19,32143 | 61,036  | 1 |
| 143 | 7 | 1 | 485,1071 | 53,85714 | 302,64286 | 20,82143 | 74,679  | 1 |
| 144 | 7 | 1 | 389,3929 | 48,28571 | 330,21429 | 12,71429 | 61      | 1 |
| 145 | 7 | 1 | 397,3409 | 50,13636 | 295,47727 | 19,29546 | 69,432  | 1 |
| 146 | 7 | 2 | 754,6875 | 26,5     | 336,84375 | 12,90625 | 39,406  | 2 |
| 147 | 7 | 2 | 713,8438 | 35,25    | 341,65625 | 11,8125  | 47,063  | 2 |
| 148 | 7 | 1 | 497,875  | 75,4375  | 370,125   | 30,21875 | 105,656 | 1 |
| 149 | 7 | 1 | 440,25   | 65,25    | 347,25    | 24,35714 | 89,607  | 1 |

|     |   |   |          |          |           |          |         |   |   |
|-----|---|---|----------|----------|-----------|----------|---------|---|---|
| 150 | - | - | -        | -        | -         | -        | -       | - | - |
| 151 | 7 | 1 | 439      | 44,25    | 287,3125  | 26,0625  | 70,313  | 1 |   |
| 152 | 7 | 2 | 338,5833 | 56,33333 | 415,875   | 15,33333 | 71,667  | 1 |   |
| 153 | 6 | 1 | 428,1667 | 47,41667 | 273,29167 | 18,91667 | 66,333  | 1 |   |
| 154 | 7 | 1 | 443,9643 | 46,71429 | 273,5     | 24,67857 | 71,393  | 1 |   |
| 155 | 7 | 1 | 426,5357 | 57,57143 | 288,28571 | 21,5     | 79,071  | 1 |   |
| 156 | 6 | 2 | 462,8929 | 32,21429 | 292,07143 | 7,392857 | 39,607  | 2 |   |
| 157 | 6 | 2 | -        | -        | -         | -        | -       | - |   |
| 158 | - | - | -        | -        | -         | -        | -       | - |   |
| 159 | 7 | 2 | 445,75   | 52,75    | 295,125   | 23,79167 | 76,542  | 1 |   |
| 160 | 7 | 1 | 430,95   | 45,375   | 352,05    | 17,35    | 62,725  | 1 |   |
| 161 | 7 | 1 | 450,2917 | 40,16667 | 252,33333 | 18,20833 | 58,375  | 2 |   |
| 162 | 6 | 1 | -        | -        | -         | -        | -       | - |   |
| 163 | 6 | 2 | 407,1786 | 36,07143 | 290,60714 | 19,5     | 55,571  | 2 |   |
| 164 | 6 | 1 | 364,4643 | 53,78571 | 282,82143 | 14,75    | 68,536  | 1 |   |
| 165 | 7 | 1 | 354,3    | 53,55    | 295,1     | 29,55    | 83,1    | 1 |   |
| 166 | 7 | 1 | 407,75   | 51,57143 | 299,85714 | 22,35714 | 73,929  | 1 |   |
| 167 | 7 | 1 | 486,3    | 29,6     | 230       | 18,7     | 48,3    | 2 |   |
| 168 | 7 | 2 | -        | -        | -         | -        | -       | - |   |
| 169 | 6 | 1 | 371,5833 | 58,16667 | 357,36111 | 27,19444 | 85,361  | 1 |   |
| 170 | 6 | 2 | 393,8333 | 48,58333 | 307,625   | 12,91667 | 61,5    | 1 |   |
| 171 | 7 | 1 | 330,5833 | 75,45833 | 304,625   | 27,95833 | 103,417 | 1 |   |
| 172 | 7 | 2 | -        | -        | -         | -        | -       | - |   |
| 173 | 7 | 2 | 364,7917 | 46       | 328,83333 | 19,83333 | 65,833  | 1 |   |
| 174 | 7 | 2 | -        | -        | -         | -        | -       | - |   |
| 175 | 7 | 2 | 291,1875 | 51,25    | 324,625   | 46,125   | 97,375  | 1 |   |
| 176 | 7 | 2 | 381,1786 | 47,10714 | 340,96429 | 12,96429 | 60,071  | 1 |   |
| 177 | 7 | 2 | 404,25   | 55,25    | 326,375   | 23,625   | 78,875  | 1 |   |
| 178 | 7 | 2 | 447,5417 | 70,95833 | 312,375   | 38,04167 | 109     | 1 |   |
| 179 | 7 | 2 | 901,025  | 20,05    | 231,175   | 4,55     | 24,6    | 2 |   |
| 180 | 7 | 1 | 717,4643 | 35,39286 | 309,21429 | 13       | 48,393  | 2 |   |
| 181 | 7 | 1 | 363,5833 | 77,41667 | 355,75    | 28,125   | 105,542 | 1 |   |
| 182 | 6 | 1 | 667,9643 | 66,14286 | 342,03571 | 32,32143 | 98,464  | 1 |   |
| 183 | 7 | 2 | 685,3125 | 29,8125  | 366,65625 | 5,375    | 35,188  | 2 |   |
| 184 | 6 | 2 | 392,4286 | 50,96429 | 324,35714 | 17,5     | 68,464  | 1 |   |
| 185 | 7 | 2 | 445,125  | 43,66667 | 270,95833 | 11,04167 | 54,708  | 2 |   |
| 186 | 6 | 2 | 466,0833 | 27,41667 | 271,20833 | 6,916667 | 34,333  | 2 |   |
| 187 | 6 | 2 | 400,6429 | 56       | 335,14286 | 20,92857 | 76,929  | 1 |   |
| 188 | 6 | 1 | -        | -        | -         | -        | -       | - |   |
| 189 | 6 | 1 | 357,1071 | 45,71429 | 311       | 14,25    | 59,964  | 2 |   |
| 190 | 7 | 1 | 463,6667 | 24,66667 | 197,5     | 10,54167 | 35,208  | 2 |   |
| 191 | 7 | 2 | 409,625  | 33,5     | 252,41667 | 12,83333 | 46,333  | 2 |   |
| 192 | 7 | 2 | 349,2083 | 60,08333 | 334,45833 | 22,45833 | 82,542  | 1 |   |
| 193 | 7 | 2 | 364,2917 | 45       | 349,91667 | 10,375   | 55,375  | 2 |   |
| 194 | 7 | 1 | 470,8333 | 52,625   | 225,5     | 31,41667 | 84,042  | 1 |   |
| 195 | 6 | 1 | 399,125  | 44       | 361,875   | 17,83333 | 61,833  | 1 |   |
| 196 | 7 | 2 | 414,9583 | 49,91667 | 304,20833 | 18,79167 | 68,708  | 1 |   |
| 197 | 6 | 2 | 350,6667 | 61,83333 | 304,25    | 13,33333 | 75,167  | 1 |   |
| 198 | 6 | 2 | 385,5417 | 58,66667 | 337,45833 | 24,125   | 82,792  | 1 |   |
| 199 | 6 | 2 | 348,9    | 52,55    | 263,8     | 20,15    | 72,7    | 1 |   |

|     |   |   |          |          |           |          |         |   |
|-----|---|---|----------|----------|-----------|----------|---------|---|
| 200 | 6 | 1 | 411,35   | 43,3     | 280,55    | 14,5     | 57,8    | 2 |
| 201 | 7 | 2 | -        | -        | -         | -        | -       | - |
| 202 | 6 | 1 | 350,25   | 60,625   | 306,375   | 32,625   | 93,25   | 1 |
| 203 | 7 | 1 | 339,5714 | 39,03571 | 275,67857 | 21,92857 | 60,964  | 1 |
| 204 | 6 | 2 | 407,15   | 46,8     | 281,75    | 11,9     | 58,7    | 2 |
| 205 | 7 | 1 | 344,4583 | 58,75    | 300       | 21,95833 | 80,708  | 1 |
| 206 | 6 | 2 | 443,6429 | 38,39286 | 308,35714 | 13,14286 | 51,536  | 2 |
| 207 | 6 | 1 | 401,5    | 39,5625  | 270,375   | 19,5625  | 59,125  | 2 |
| 208 | 7 | 1 | 420,125  | 47,91667 | 236,29167 | 28,125   | 76,042  | 1 |
| 209 | 7 | 1 | 562      | 57,78571 | 310,17857 | 65,53571 | 123,321 | 1 |
| 210 | 7 | 1 | -        | -        | -         | -        | -       | - |
| 211 | 7 | 1 | 369,0357 | 35,28571 | 348,71429 | 13,35714 | 48,643  | 2 |
| 212 | 7 | 1 | 390,875  | 51,625   | 294,79167 | 17,875   | 69,5    | 1 |
| 213 | 7 | 1 | -        | -        | -         | -        | -       | - |
| 214 | 7 | 2 | 353,4    | 54,35    | 373,15    | 23,8     | 78,15   | 1 |
| 215 | 6 | 2 | 293,9583 | 40,625   | 326,79167 | 9,458333 | 50,083  | 2 |
| 216 | 6 | 2 | 406      | 40,5     | 297,20833 | 9,833333 | 50,333  | 2 |
| 217 | 6 | 1 | 305,6786 | 63,60714 | 340,60714 | 33,28571 | 96,893  | 1 |
| 218 | 7 | 2 | 366,0417 | 35,04167 | 268,70833 | 14,41667 | 49,458  | 2 |
| 219 | 7 | 2 | 393,05   | 47,95    | 271,3     | 20,4     | 68,35   | 1 |
| 220 | 7 | 2 | 401,3929 | 46,46429 | 322,32143 | 14,14286 | 60,607  | 1 |
| 221 | 7 | 2 | -        | -        | -         | -        | -       | - |
| 222 | 7 | 1 | -        | -        | -         | -        | -       | - |
| 223 | 7 | 2 | 382,15   | 43,5     | 348,1     | 27,7     | 71,2    | 1 |
| 224 | 6 | 2 | 259,35   | 67,5     | 358,7     | 38,35    | 105,85  | 1 |
| 225 | 7 | 2 | 486,3    | 33,1     | 227,95    | 11,55    | 44,65   | 2 |
| 226 | 6 | 1 | -        | -        | -         | -        | -       | - |
| 227 | 7 | 2 | 410,65   | 40,55    | 266,7     | 23       | 63,55   | 1 |
| 228 | 7 | 1 | 394,8    | 50,8     | 275,15    | 20       | 70,8    | 1 |
| 229 | 6 | 1 | 295,75   | 37,1     | 317,8     | 20,35    | 57,45   | 2 |
| 230 | 7 | 2 | 313,25   | 45,6875  | 269,125   | 29       | 74,688  | 1 |
| 231 | 6 | 1 | 463,75   | 40,875   | 301,125   | 28,9375  | 69,813  | 1 |
| 232 | - | - | -        | -        | -         | -        | -       | - |
| 233 | 7 | 2 | -        | -        | -         | -        | -       | - |
| 234 | 7 | 2 | 339,3125 | 42,625   | 255,4375  | 14,0625  | 56,688  | 2 |
| 235 | 8 | 1 | 251,3333 | 26,16667 | 462       | 18,66667 | 44,833  | 2 |
| 236 | 7 | 1 | 420,875  | 55,33333 | 298,58333 | 26,70833 | 82,042  | 1 |
| 237 | 6 | 1 | 430,45   | 56,65    | 315,7     | 22       | 78,65   | 1 |
| 238 | 7 | 1 | 474,5667 | 52,03333 | 255,83333 | 18,73333 | 70,767  | 1 |
| 239 | 6 | 1 | -        | -        | -         | -        | 0       | 2 |
| 240 | 7 | 1 | 375,7143 | 55,25    | 327,64286 | 20,32143 | 75,571  | 1 |
| 241 | 6 | 2 | 407,625  | 43,79167 | 348,33333 | 15,79167 | 59,583  | 2 |
| 242 | 6 | 2 | 302,3    | 57,3     | 337,2     | 29,5     | 86,8    | 1 |
| 243 | 6 | 2 | 356,625  | 48,25    | 304,125   | 24,0625  | 72,313  | 1 |
| 244 | 7 | 1 | 367,2083 | 53,75    | 347,91667 | 26,375   | 80,125  | 1 |
| 245 | 6 | 2 | 533,375  | 41,54167 | 288,45833 | 12,16667 | 53,708  | 2 |
| 246 | 7 | 2 | 400,9    | 53,15    | 259,85    | 42,05    | 95,2    | 1 |
| 247 | 7 | 1 | 284,5714 | 84,17857 | 280,28571 | 61,92857 | 146,107 | 1 |
| 248 | 6 | 2 | 450,0417 | 51,20833 | 275,875   | 35,16667 | 86,375  | 1 |
| 249 | 7 | 2 | -        | -        | -         | -        | -       | - |



| Handgrip/kg | 20mshuttle/laps | 4x10m/sec | Standing longjump/cm | Body weight/kg |    |
|-------------|-----------------|-----------|----------------------|----------------|----|
| 11,65       |                 | 12        | 14,12                | 160            | 22 |
| 7,75        |                 | 42        | 14,45                | 108            | 21 |
| 12,65       |                 | 15        | 14,14                | 145            | 22 |
| 9,65        |                 | 39        | 14,64                | 136            | 22 |
| 11,1        |                 | 22        | 14,5                 | 120            | 24 |
| 11,15       |                 | 32        | 15,22                | 122            | 26 |
| 12,95       |                 | 43        | 14,1                 | 147            | 26 |
| 9,2         |                 | 30        | 16,06                | 105            | 22 |
| 7           |                 | 18        | 20,93                | 83             | 22 |
| 10,1        |                 | 22        | 15,12                | 144            | 26 |
| 8,8         |                 | 12        | 15,81                | 118            | 23 |
| 8,25        |                 | 22        | 16,53                | 117            | 19 |
| 16,35 -     |                 |           | 14,37                | 143            | 35 |
| 9,35        |                 | 17        | 15,37                | 110            | 23 |
| 10,85       |                 | 22        | 14,75                | 123            | 26 |
| 7,75        |                 | 14        | 15,23                | 128            | 22 |
| 7,7         |                 | 27        | 16,72                | 88             | 23 |
| 10,9        |                 | 15        | 17,87                | 106            | 24 |
| 9,3         |                 | 27        | 15,84                | 114            | 23 |
| 9           |                 | 15        | 16                   | 104            | 28 |
| 9,45        |                 | 22        | 14,97                | 120            | 23 |
| 9,1         |                 | 19        | 14,63                | 136            | 23 |
| 8,25        |                 | 14        | 17,5                 | 90             | 22 |
| 8,85        |                 | 22        | 16,82                | 122            | 21 |
| 11,75       |                 | 20        | 14,03                | 102            | 25 |
| 9,95        |                 | 36        | 15,19                | 120            | 23 |
| 9,9         |                 | 36        | 14,31                | 120            | 26 |
| 11,3        |                 | 22        | 16,43                | 142            | 26 |
| 7,75        |                 | 12        | 16,37                | 98             | 24 |
| 7,75        |                 | 19        | 15,75                | 106            | 20 |
| 12,4        |                 | 26        | 15,38                | 115            | 34 |
| 9,6         |                 | 22        | 15,06                | 88             | 20 |
| 13,5        |                 | 36        | 14,12                | 140            | 29 |
| 10,65       |                 | 20        | 17,25                | 100            | 24 |
| 11,65       |                 | 12        | 14,68                | 122            | 33 |
| 8,75        |                 | 16        | 16,88                | 125            | 26 |
| 11,25       |                 | 26        | 16,66                | 132            | 20 |
| 12,35       |                 | 11        | 17,85                | 120            | 28 |
| 13,05       |                 | 13        | 15,53                | 112            | 28 |
| 7,7         |                 | 22        | 16,15                | 116            | 22 |
| 10,85       |                 | 13        | 17,66                | 130            | 22 |
| 8,05        |                 | 8         | 19,58                | 96             | 34 |
| 9,65        |                 | 35        | 16,25                | 122            | 23 |
| 10,85       |                 | 14        | 14,9                 | 94             | 35 |
| 11,35       |                 | 15        | 17,16                | 128            | 24 |
| 8,25        |                 | 23        | 15,45                | 116            | 25 |
| 10,55       |                 | 22        | 16,38                | 126            | 24 |
| 14,5        |                 | 15        | 14,81                | 150            | 25 |
| -           |                 | 8         | 16,77                | 110            | 20 |

|         |      |         |       |    |
|---------|------|---------|-------|----|
| 10,85   | 23   | 16,47   | 126   | 27 |
| 13,7    | 10   | 18,4    | 101   | 38 |
| 11,4    | 12   | 17,63   | 106   | 22 |
| 9,1     | 37   | 15,41   | 126   | 21 |
| 12,75   | 39   | 14      | 146 - |    |
| 11,05   | 12   | 15,65   | 125   | 21 |
| 15,85   | 27   | 16,47   | 110   | 37 |
| 10,95   | 39   | 17,03   | 100   | 29 |
| 8,95    | 12   | 14,56   | 124   | 20 |
| 16,4    | 18   | 13,15   | 128   | 30 |
| 7,75    | 17   | 16,97   | 108   | 17 |
| 15 -    |      | 15,22   | 145   | 27 |
| 13      | 37   | 14,47   | 138   | 26 |
| 12,25   | 18   | 16,5    | 98    | 24 |
| -       | -    | -       | -     | -  |
| 6,75    | 16   | 15,35   | 120   | 22 |
| 11,45   | 21   | 15,81   | 134   | 23 |
| 11,45   | 20   | 15,66   | 132   | 28 |
| 12,15   | 21   | 15,58   | 132   | 25 |
| 7,5     | 15 - |         | 111   | 21 |
| 8,2     | 10   | 19,12   | 88    | 41 |
| -       | -    | -       | -     | -  |
| -       | -    | -       | -     | 26 |
| 12,85   | 22   | 15,43   | 93    | 28 |
| 10,75   | 21   | 13,88   | 112   | 24 |
| 10,8 -  |      | 13,25   | 144   | 23 |
| -       | -    | -       | -     | -  |
| -       | -    | -       | -     | 26 |
| 11,75   | 16   | 14,72   | 128 - |    |
| -       | -    | -       | -     | -  |
| -       | -    | -       | -     | -  |
| -       | -    | -       | -     | 24 |
| 12,4    | 10   | 13,81 - |       | 28 |
| 14,1    | 13   | 16,41   | 108   | 35 |
| 7,9     | 17   | 15,5    | 126   | 22 |
| 11,25   | 25   | 13,03   | 143   | 29 |
| 14,15   | 10   | 14,84   | 138   | 27 |
| -       | -    | -       | -     | 22 |
| 8,8 -   |      | 14,59   | 130   | 27 |
| 10,1    | 9    | 14,88   | 120   | 28 |
| 11,5    | 21   | 14,44   | 128   | 23 |
| -       | 14   | 13,94   | 138   | 24 |
| -       | -    | -       | -     | -  |
| 8,6     | 14   | 16,13   | 116   | 19 |
| 14,15   | 6    | 15,07   | 118   | 35 |
| 13,25   | 18   | 13,53   | 121   | 22 |
| 8,2     | 17   | 15,72   | 104   | 18 |
| 8,55    | 17   | 14,56   | 96    | 21 |
| 10,6    | 10   | 15,19   | 88    | 21 |
| 11,85 - |      | 14,31   | 126   | 23 |

|       |    |       |     |    |
|-------|----|-------|-----|----|
| 11,35 | 13 | 14,87 | 118 | 22 |
| 12,7  | 15 | 13,91 | 124 | 26 |
| 9,25  | 29 | 13,75 | 130 | 20 |
| -     | -  | -     | -   | 32 |
| 7,05  | 7  | 19,25 | 110 | 20 |
| -     | -  | -     | -   | 36 |
| 8,85  | 29 | 13,87 | 118 | 24 |
| 9,4   | 29 | 13,63 | 120 | 23 |
| 11,15 | 9  | 16,41 | 130 | 28 |
| 11,25 | 12 | 13,84 | 146 | 26 |
| 12,05 | 30 | 13,97 | 114 | 31 |
| 8,75  | 17 | 17,65 | 94  | 21 |
| -     | -  | -     | -   | 28 |
| 8,8   | 21 | 14,68 | 104 | 32 |
| 9,6   | 29 | 16,34 | 130 | 22 |
| -     | -  | -     | -   | 24 |
| 16,7  | 11 | 15,16 | 108 | 38 |
| 14,75 | 52 | 12,65 | 158 | 30 |
| 9,7   | 12 | 16,28 | 120 | 27 |
| 7,1   | 29 | 14,35 | 120 | 27 |
| -     | -  | -     | -   | 28 |
| 9,5   | 12 | 16,84 | 110 | 26 |
| -     | -  | -     | -   | -  |
| -     | -  | -     | -   | 20 |
| 12,25 | 20 | 16,91 | 96  | -  |
| 14,4  | 15 | 14,75 | 128 | 30 |
| 11,2  | 15 | 14,6  | 124 | 22 |
| -     | -  | -     | -   | -  |
| 12,35 | 12 | 15,75 | 100 | 34 |
| 12,95 | 39 | 13,94 | 144 | 21 |
| -     | -  | -     | -   | 24 |
| 12,15 | 8  | 14,22 | 120 | 32 |
| 8,05  | 7  | 18,46 | 90  | 22 |
| 9,45  | 10 | 15,22 | 122 | 21 |
| 10,3  | 8  | 20    | 110 | 25 |
| 12,15 | 24 | 13,36 | 130 | 25 |
| -     | -  | -     | -   | 23 |
| 9,5   | 6  | 14,84 | 128 | 24 |
| 13,35 | 8  | 13,31 | 126 | 26 |
| 13,25 | 8  | 13,85 | 138 | 30 |
| -     | -  | -     | -   | -  |
| 10,4  | 28 | 13,7  | 136 | 23 |
| 13,7  | 26 | 14,03 | 138 | 24 |
| 11,45 | 54 | 13,41 | 152 | 26 |
| 11,9  | 52 | 12,25 | 144 | 22 |
| 11,45 | 52 | 12,84 | 160 | 21 |
| 12    | 28 | 12,91 | 152 | 22 |
| 11,5  | 31 | 13,87 | 148 | 22 |
| 13,6  | 33 | 16,06 | 135 | 26 |
| -     | -  | -     | -   | -  |

|   |       |    |       |     |    |
|---|-------|----|-------|-----|----|
| - | -     | -  | -     | -   | -  |
|   | 8,65  | 4  | 16,65 | 112 | 27 |
|   | 10,5  | 12 | 14,96 | 120 | 23 |
|   | 11,25 | 6  | 15,31 | 106 | 22 |
|   | 12,85 | 39 | 13,53 | 140 | 27 |
|   | 10,9  | 39 | 15,5  | 138 | -  |
|   | 6,95  | 8  | 14,81 | 106 | 23 |
|   | 9,7   | 12 | 15,09 | 118 | 24 |
|   | 11,5  | 10 | 15,35 | 123 | -  |
| - | -     | -  | -     | -   | 23 |
|   | 12,75 | 14 | 15,16 | 125 | 25 |
|   | 10,6  | 16 | 13,75 | 120 | 28 |
|   | 11,5  | 12 | 15,56 | 127 | 28 |
| - | -     | -  | -     | -   | -  |
|   | 11,15 | 14 | 15,28 | 125 | 26 |
| - | -     | -  | -     | -   | 25 |
|   | 13,2  | 12 | 14,97 | 110 | 34 |
|   | 12,5  | 20 | 14,75 | 140 | -  |
| - | -     | -  | -     | -   | 26 |
|   | 11,45 | 10 | 13,56 | 130 | 25 |
|   | 8,8   | 14 | 15,6  | 105 | 19 |
| - | -     | -  | -     | -   | -  |
|   | 13,35 | 17 | 14,75 | 150 | 27 |
|   | 8,85  | 17 | 15,47 | 122 | 21 |
|   | 11,25 | 13 | 17,63 | 116 | 31 |
|   | 12,15 | 13 | 15,71 | 140 | 26 |
| - | -     | -  | -     | -   | 19 |
|   | 12,05 | 15 | 16,15 | 120 | -  |
|   | 7,55  | 10 | 17,03 | 122 | 21 |
|   | 11,45 | 9  | 16,66 | 96  | 29 |
|   | 15,1  | 12 | 16,34 | 145 | 31 |
|   | 10,7  | 20 | 13,75 | 126 | 29 |
|   | 9,7   | 46 | 13,91 | 124 | 21 |
|   | 8,95  | 22 | 16,22 | 135 | 18 |
|   | 9,3   | 20 | 15,84 | 110 | 20 |
|   | 9,85  | 20 | 15,13 | 110 | 24 |
|   | 12,7  | 9  | 15,34 | 100 | 31 |
|   | 11,15 | 22 | 13,56 | 140 | 22 |
|   | 11,35 | 7  | 16,41 | 106 | 24 |
|   | 15,35 | 30 | 15,31 | 124 | 27 |
|   | 10,15 | 15 | 14,16 | 112 | 25 |
|   | 12,55 | 17 | 15,75 | 120 | 30 |
|   | 9,95  | 16 | 14,53 | 140 | 21 |
|   | 13,3  | 16 | 14,81 | 116 | 29 |
|   | 11,85 | 19 | 14,34 | 140 | 30 |
|   | 9,45  | 16 | 14,41 | 134 | 20 |
|   | 9,8   | 18 | 15,47 | 100 | 24 |
|   | 9,8   | 16 | 13,5  | 134 | 20 |
|   | 6,85  | 16 | 15,07 | 106 | 21 |
|   | 9,45  | 16 | 14,62 | 102 | 22 |

|   |       |    |       |     |    |
|---|-------|----|-------|-----|----|
| - | -     | -  | -     | -   | 24 |
|   | 13,9  | 19 | 13,72 | 128 | 34 |
|   | 7,85  | 24 | 13,87 | 132 | 23 |
|   | 11,65 | 38 | 12,66 | 142 | 24 |
|   | 9,9   | 23 | 14,72 | 132 | 27 |
| - | -     | -  | -     | -   | -  |
|   | 11,15 | 10 | 14,87 | 102 | 27 |
|   | 7,05  | 18 | 13,87 | 134 | 21 |
| - | -     | -  | -     | -   | 29 |
| - | -     | -  | -     | -   | 34 |
|   | 12,85 | 31 | 13,28 | 132 | 28 |
|   | 10,05 | 14 | 13,59 | 138 | 22 |
|   | 13,1  | 13 | 13,44 | 128 | 29 |
| - | -     | -  | -     | -   | 26 |
|   | 15,1  | 8  | 14,22 | 152 | 26 |
|   | 9,7   | 8  | 14,25 | 136 | 25 |
| - | -     | -  | -     | -   | 24 |
|   | 9,95  | 9  | 14,87 | 122 | 26 |
|   | 11,75 | 14 | 15,4  | 130 | 21 |
|   | 11,2  | 14 | 13,47 | 122 | 26 |
|   | 11,95 | 10 | 13,5  | 120 | 24 |
|   | 11,9  | 10 | 15,63 | 110 | 28 |
|   | 13,55 | 33 | 14,19 | 142 | 23 |
|   | 7,65  | 28 | 14,25 | 97  | 19 |
|   | 10,55 | 12 | 15,41 | 125 | 25 |
|   | 6,55  | 8  | 17,41 | 97  | 27 |
|   | 13,15 | 12 | 14,06 | 134 | 27 |
|   | 11,15 | 28 | 16,44 | 135 | 29 |
|   | 9,1   | 19 | 19    | 112 | 32 |
|   | 9,95  | 16 | 16,47 | 102 | 19 |
|   | 10,15 | 10 | 14,69 | 130 | 24 |
|   | 11,45 | 27 | 14,18 | 158 | 23 |
| - | -     | -  | -     | -   | -  |
|   | 10,2  | 22 | 14,43 | 110 | 22 |
|   | 10,5  | 12 | 14    | 136 | 28 |
|   | 12,35 | 17 | 13,94 | 100 | 23 |
|   | 11,35 | 26 | 14,87 | 145 | 22 |
| - | -     | -  | -     | -   | 34 |
| - | -     | -  | -     | -   | 21 |
|   | 8,55  | 6  | 14,62 | 136 | 23 |
|   | 10,4  | 17 | 17,37 | 136 | 22 |
| - | -     | -  | -     | -   | 24 |
|   | 9,7   | 24 | 13,16 | 125 | 24 |
|   | 8,7   | 20 | 17,44 | 100 | 26 |
|   | 13,7  | 26 | 13,37 | 140 | 23 |
|   | 9,9   | -  | 39    | 57  | 28 |
| - | -     | -  | -     | -   | 23 |
|   | 11,4  | 9  | 14,88 | -   | 30 |
|   | 11,25 | 23 | 15,15 | 140 | 24 |
| - | -     | -  | -     | -   | -  |

|   |       |    |       |     |    |
|---|-------|----|-------|-----|----|
|   | 6,3   | 9  | 16    | 82  | 23 |
|   | 12,8  | 14 | 13,5  | 142 | 27 |
| - | -     | -  | -     |     | 22 |
|   | 14,75 | 10 | 13,41 | 126 | 26 |
|   | 8,8   | 12 | 16,63 | 100 | 22 |
| - | -     | -  | -     |     | 21 |
| - | -     | -  | -     |     | 26 |
|   | 12,85 | 20 | 15,78 | 126 | 26 |
|   | 13    | 12 | 15,59 | 128 | 28 |
|   | 10,25 | 20 | 15,88 | 145 | 25 |
| - | -     | -  | -     | -   |    |
|   | 7,85  | 18 | 15,82 | 122 | 22 |
|   | 7,6   | 10 | 14,78 | 100 | 22 |
|   | 14,25 | 11 | 15,12 | 112 | 32 |
|   | 10,4  | 28 | 13    | 128 | 20 |
| - | -     | -  | -     |     | 24 |
|   | 16,1  | 14 | 14,87 | 145 | 32 |
|   | 6,35  | 3  | 21,94 | 66  | 18 |
| - | -     | -  | -     |     | 24 |
|   | 11,85 | 22 | 14,78 | 126 | 28 |
|   | 12,25 | 28 | 15,22 | 136 | 24 |
|   | 13,8  | 11 | 13,54 | 135 | 31 |
|   | 8,7   | 8  | 15,63 | 125 | 22 |
|   | 11,45 | 11 | 14,53 | 150 | 31 |
|   | 11,15 | 16 | 16,09 | 115 | 28 |
|   | 9,2   | 22 | 14,97 | 124 | 22 |
| - | -     | -  | -     | -   |    |
|   | 12,3  | 16 | 14,38 | 126 | 23 |
| - | -     | -  | -     |     | 29 |
| - | -     | -  | -     | -   |    |
| - | -     | -  | -     | -   |    |
|   | 11,85 | 19 | 13,97 | 128 | 21 |
| - | -     | -  | -     |     | 26 |
| - | -     | -  | -     |     | 20 |
| - | -     | -  | -     | -   |    |
| - | -     | -  | -     | -   |    |

| Body height/cm | KMI       | Biceps | Triceps | Subscapulare | Iliac | Fatperc  | Fatmass  |
|----------------|-----------|--------|---------|--------------|-------|----------|----------|
| 1,23           | 14,541609 | 4      | 8       | 4,5          | 8,2   | 17,09375 | 3,760625 |
| 1,17           | 15,340785 | 6,3    | 8,7     | 5            | 9     | 18,28103 | 3,839016 |
| 1,23           | 14,541609 | 3,5    | 6,2     | 4            | 5     | 14,71348 | 3,236966 |
| 1,25           | 14,08     | 3,5    | 5,5     | 5            | 5     | 15,03175 | 3,306985 |
| 1,28           | 14,648438 | 4      | 8       | 4,3          | 7,3   | 16,89223 | 4,054135 |
| 1,22           | 17,468422 | 6,7    | 13      | 8            | 11,3  | 24,697   | 6,42122  |
| 1,26           | 16,376921 | 3      | 6       | 4            | 5,8   | 14,5     | 3,77     |
| 1,22           | 14,780973 | 4      | 8       | 6            | 10    | 18,572   | 4,08584  |
| 1,18           | 15,800057 | 7      | 11,7    | 6            | 6,8   | 21,96823 | 4,833011 |
| 1,28           | 15,869141 | 6      | 10,8    | 7            | 13,8  | 22,05508 | 5,734321 |
| 1,23           | 15,202591 | 5,2    | 7       | 5,2          | 9     | 16,79108 | 3,861948 |
| 1,17           | 13,879757 | 5      | 13,3    | 4,3          | 4,8   | 21,88112 | 4,157413 |
| 1,36           | 18,92301  | 7,5    | 13      | 8,3          | 16,8  | 24,93103 | 8,725861 |
| 1,29           | 13,821285 | 5,5    | 10,5    | 6,7          | 10    | 21,53008 | 4,951918 |
| 1,27           | 16,120032 | 4      | 8       | 4,5          | 7,2   | 17,09375 | 4,444375 |
| 1,23           | 14,541609 | 8      | 10      | 6,3          | 12,7  | 20,72503 | 4,559507 |
| 1,22           | 15,452835 | 8      | 10,8    | 6            | 8,7   | 21,17488 | 4,870222 |
| 1,19           | 16,947956 | 4,7    | 9       | 6,5          | 11,7  | 19,99175 | 4,79802  |
| 1,25           | 14,72     | 6,8    | 10,7    | 7            | 11    | 21,96823 | 5,052693 |
| 1,26           | 17,636684 | 14,5   | 21,7    | 14           | 23    | 33,41263 | 9,355536 |
| 1,24           | 14,958377 | 5      | 7,2     | 4,3          | 7     | 16,07575 | 3,697423 |
| 1,22           | 15,452835 | 7      | 10,8    | 6            | 12    | 21,17488 | 4,870222 |
| 1,2            | 15,277778 | 6,2    | 9,5     | 6            | 10,7  | 19,99175 | 4,398185 |
| 1,18           | 15,081873 | 5      | 8,8     | 5            | 7,5   | 18,37828 | 3,859439 |
| 1,28           | 15,258789 | 5      | 7       | 5            | 7     | 16,588   | 4,147    |
| 1,24           | 14,958377 | 3,5    | 8       | 5,5          | 10    | 18,08575 | 4,159723 |
| 1,24           | 16,909469 | 5,8    | 9       | 5,8          | 6,5   | 19,33648 | 5,027485 |
| 1,29           | 15,624061 | 3,5    | 8       | 5,2          | 6,5   | 17,79088 | 4,625629 |
| 1,2            | 16,666667 | 7,5    | 13      | 6,5          | 11,2  | 23,49175 | 5,63802  |
| 1,17           | 14,610271 | 7      | 9       | 5            | 6,8   | 18,572   | 3,7144   |
| 1,36           | 18,382353 | 12,2   | 19      | 18           | 23    | 33,913   | 11,53042 |
| 1,24           | 13,007284 | 4      | 9       | 4,2          | 6     | 17,79088 | 3,558176 |
| 1,33           | 16,394369 | 7,3    | 11,2    | 7            | 13,7  | 22,39988 | 6,495965 |
| 1,28           | 14,648438 | 6,8    | 9       | 5            | 9,8   | 18,572   | 4,45728  |
| 1,34           | 18,378258 | 9,2    | 10,5    | 7            | 14,5  | 21,79375 | 7,191938 |
| 1,29           | 15,624061 | 6,5    | 8       | 4,5          | 8,3   | 17,09375 | 4,444375 |
| 1,19           | 14,123296 | 3,7    | 7       | 6            | 8     | 17,593   | 3,5186   |
| 1,35           | 15,363512 | 6,7    | 11      | 7            | 12    | 22,228   | 6,22384  |
| 1,26           | 17,636684 | 6,8    | 12      | 11           | 15,7  | 26,213   | 7,33964  |
| 1,22           | 14,780973 | 8      | 9       | 8            | 11,7  | 21,353   | 4,69766  |
| 1,26           | 13,857395 | 4      | 6       | 4            | 3     | 14,5     | 3,19     |
| 1,24           | 22,112383 | 14,3   | 18      | 14,7         | 24    | 32,09023 | 10,91068 |
| 1,27           | 14,260029 | 3,5    | 6,7     | 4            | 7,5   | 15,24263 | 3,505805 |
| 1,35           | 19,20439  | 12,3   | 19,2    | 17,5         | 23,7  | 33,80143 | 11,8305  |
| 1,22           | 16,124698 | 6      | 11      | 6,2          | 13    | 21,53008 | 5,167219 |
| 1,22           | 16,79656  | 5      | 11      | 5,7          | 8     | 21,08543 | 5,271357 |
| 1,24           | 15,608741 | 6      | 8       | 6            | 6,8   | 18,572   | 4,45728  |
| 1,23           | 16,524555 | 5,3    | 9,8     | 6            | 7     | 20,26868 | 5,06717  |
| 1,18           | 14,363689 | 5      | 9       | 6            | 9,7   | 19,525   | 3,905    |

|      |           |      |      |      |      |          |          |
|------|-----------|------|------|------|------|----------|----------|
| 1,26 | 17,006803 | 9,3  | 13,3 | 10   | 15   | 26,43143 | 7,136486 |
| 1,28 | 23,193359 | 17   | 20,3 | 20   | 34,8 | 34,98583 | 13,29462 |
| 1,17 | 16,071298 | 8    | 15,3 | 6,5  | 9,7  | 25,31588 | 5,569494 |
| 1,19 | 14,829461 | 5,2  | 8    | 4    | 5,7  | 16,588   | 3,48348  |
| -    | -         | -    | -    | -    | -    | -        | -        |
| 1,23 | 13,880627 | 4,2  | 7,5  | 5    | 8    | 17,09375 | 3,589688 |
| 1,34 | 20,605926 | 15,3 | 24,5 | 20   | 29,8 | 35,94175 | 13,29845 |
| 1,32 | 16,64371  | 7,8  | 13,8 | 8,7  | 13,8 | 25,84375 | 7,494688 |
| 1,19 | 14,123296 | 4,5  | 7,5  | 4    | 6,8  | 16,07575 | 3,21515  |
| 1,34 | 16,707507 | 5,5  | 8    | 7    | 10   | 19,525   | 5,8575   |
| 1,1  | 14,049587 | 3,8  | 5,5  | 4    | 6,8  | 13,96175 | 2,373498 |
| 1,29 | 16,224986 | 5    | 9    | 8,8  | 14,2 | 22,05508 | 5,954872 |
| 1,26 | 16,376921 | 6    | 8,8  | 5,2  | 10   | 18,572   | 4,82872  |
| 1,26 | 15,117158 | 5    | 8    | 5    | 5    | 17,593   | 4,22232  |
| -    | -         | -    | -    | -    | -    | -        | -        |
| 1,18 | 15,800057 | 6    | 11,3 | 10,8 | 8    | 25,54367 | 5,619607 |
| 1,23 | 15,202591 | 4,7  | 6,2  | 5,2  | 5,5  | 15,97252 | 3,67368  |
| 1,33 | 15,829046 | 5    | 7    | 4,5  | 6    | 16,07575 | 4,50121  |
| 1,28 | 15,258789 | 5,2  | 9    | 5    | 7    | 18,572   | 4,643    |
| 1,22 | 14,10911  | 6,2  | 11,8 | 6    | 8    | 22,05508 | 4,631567 |
| 1,32 | 23,530762 | 18   | 27,7 | 22   | 30   | 36,48983 | 14,96083 |
| -    | -         | -    | -    | -    | -    | -        | -        |
| 1,29 | 15,624061 | 8,2  | 10,2 | 5,8  | 10,8 | 20,452   | 5,31752  |
| 1,26 | 17,636684 | 9,7  | 11,5 | 9    | 19,2 | 24,30175 | 6,80449  |
| 1,3  | 14,201183 | 7,8  | 9,2  | 5,5  | 7    | 19,24183 | 4,618039 |
| 1,22 | 15,452835 | 5,2  | 7,2  | 5,2  | 8,8  | 16,99312 | 3,908418 |
| -    | -         | -    | -    | -    | -    | -        | -        |
| 1,21 | 17,75835  | 9    | 11   | 6,8  | 16   | 22,05508 | 5,734321 |
| -    | -         | -    | -    | -    | -    | -        | -        |
| -    | -         | -    | -    | -    | -    | -        | -        |
| -    | -         | -    | -    | -    | -    | -        | -        |
| 1,26 | 15,117158 | 7,8  | 8    | 5    | 13   | 17,593   | 4,22232  |
| 1,3  | 16,568047 | 7,2  | 9,7  | 6,8  | 9    | 20,90575 | 5,85361  |
| 1,28 | 21,362305 | 13   | 15   | 14   | 31   | 30,137   | 10,54795 |
| 1,21 | 15,026296 | 8    | 9,8  | 6,2  | 9,2  | 20,452   | 4,49944  |
| 1,26 | 18,266566 | 7    | 11   | 7,2  | 9,5  | 22,39988 | 6,495965 |
| 1,34 | 15,036757 | 3,5  | 6    | 4,5  | 9    | 15,03175 | 4,058573 |
| 1,21 | 15,026296 | 7    | 7,8  | 5    | 8    | 17,39408 | 3,826698 |
| 1,32 | 15,495868 | 6    | 9,7  | 5,2  | 10,8 | 19,43087 | 5,246335 |
| 1,33 | 15,829046 | 7,8  | 11,2 | 8,5  | 15   | 23,65583 | 6,623632 |
| 1,27 | 14,260029 | 5,2  | 8,2  | 6    | 7,5  | 18,76468 | 4,315876 |
| 1,29 | 14,42221  | 3,5  | 5,8  | 4    | 5    | 14,28548 | 3,428515 |
| -    | -         | -    | -    | -    | -    | -        | -        |
| 1,14 | 14,619883 | 6    | 7    | 4,5  | 6,5  | 16,07575 | 3,054393 |
| 1,3  | 20,710059 | 10,3 | 14,2 | 13,8 | 26,7 | 29,548   | 10,3418  |
| 1,2  | 15,277778 | 3,5  | 6    | 4    | 5    | 14,5     | 3,19     |
| 1,17 | 13,149244 | 4    | 7    | 4    | 4,8  | 15,557   | 2,80026  |
| 1,18 | 15,081873 | 7,7  | 11   | 6,2  | 12   | 21,53008 | 4,521317 |
| 1,19 | 14,829461 | 5    | 7    | 6    | 6,5  | 17,593   | 3,69453  |
| 1,2  | 15,972222 | 3,8  | 6,5  | 5    | 7    | 16,07575 | 3,697423 |



|      |           |      |      |      |      |          |          |   |
|------|-----------|------|------|------|------|----------|----------|---|
| -    | -         | -    | -    | -    | -    | -        | -        | - |
| 1,27 | 16,740033 | 10,2 | 11,8 | 10   | 20,8 | 25,31588 | 6,835288 |   |
| 1,26 | 14,487276 | 8    | 10,5 | 6,2  | 10,7 | 21,08543 | 4,849649 |   |
| 1,23 | 14,541609 | 6    | 7    | 5    | 9    | 16,588   | 3,64936  |   |
| 1,31 | 15,733349 | 7    | 8    | 6    | 9    | 18,572   | 5,01444  |   |
| -    | -         | -    | -    | -    | -    | -        | -        | - |
| 1,2  | 15,972222 | 5    | 8    | -    | -    | -        | -        | - |
| 1,22 | 16,124698 | 8,3  | 13,2 | 6,2  | 13,7 | 23,40932 | 5,618237 |   |
| -    | -         | -    | -    | 6,5  | 16,2 | -        | -        | - |
| 1,26 | 14,487276 | 5,5  | 7,2  | -    | -    | -        | -        | - |
| 1,28 | 15,258789 | 4,2  | 7,2  | 5,5  | 7,2  | 17,29423 | 4,323557 |   |
| 1,23 | 18,507502 | 10,8 | 9,8  | 5    | 5,2  | 19,33648 | 5,414214 |   |
| 1,28 | 17,089844 | 6,8  | 6,8  | 9    | 17,8 | 20,26868 | 5,67523  |   |
| -    | -         | -    | -    | 5,8  | 8    | -        | -        | - |
| 1,27 | 16,120032 | 7    | 8,8  | -    | -    | -        | -        | - |
| 1,28 | 15,258789 | 5,8  | 7,5  | 5    | 10,2 | 17,09375 | 4,273438 |   |
| 1,31 | 19,812365 | 10,2 | 13,8 | 4,5  | 11   | 22,48543 | 7,645046 |   |
| -    | -         | -    | -    | 9    | 22,2 | -        | -        | - |
| 1,26 | 16,376921 | 9,2  | 12,8 | -    | -    | -        | -        | - |
| 1,26 | 15,74704  | 6    | 7,8  | 7,2  | 15   | 19,525   | 4,88125  |   |
| 1,14 | 14,619883 | 5,2  | 7    | 5,2  | 11,7 | 16,79108 | 3,190305 |   |
| -    | -         | -    | -    | 5    | 5,3  | -        | -        | - |
| 1,29 | 16,224986 | 6    | 8    | -    | -    | -        | -        | - |
| 1,24 | 13,657648 | 6    | 8    | 5,8  | 8    | 18,37828 | 3,859439 |   |
| 1,31 | 18,064215 | 9,8  | 12   | 4,2  | 6    | 20,63428 | 6,396627 |   |
| 1,24 | 16,909469 | 6,8  | 9    | 8    | 18,2 | 21,353   | 5,55178  |   |
| 1,15 | 14,36673  | 8    | 9    | 5,5  | 7,8  | 19,05175 | 3,619832 |   |
| -    | -         | -    | -    | 5    | 7,5  | -        | -        | - |
| 1,21 | 14,343283 | 5    | 6    | -    | -    | -        | -        | - |
| 1,22 | 19,48401  | 9,8  | 16   | 4,2  | 7,2  | 24,06148 | 6,977829 |   |
| 1,33 | 17,525016 | 6    | 10   | 10,7 | 22,7 | 24,46063 | 7,582795 |   |
| 1,27 | 17,980036 | 6    | 10   | 6,2  | 10   | 20,63428 | 5,983941 |   |
| 1,16 | 15,606421 | 4,8  | 7    | 7    | 12   | 18,572   | 3,90012  |   |
| 1,12 | 14,34949  | 4,8  | 8,8  | 6    | 5    | 19,33648 | 3,480566 |   |
| 1,16 | 14,863258 | 5    | 6,5  | 5,5  | 6,8  | 16,588   | 3,3176   |   |
| 1,26 | 15,117158 | 7,8  | 11,8 | 4    | 6    | 20,26868 | 4,864483 |   |
| 1,25 | 19,84     | 10,2 | 19   | 8    | 12,5 | 28,933   | 8,96923  |   |
| 1,21 | 15,026296 | 4,7  | 8    | 20   | 27   | 29,548   | 6,50056  |   |
| 1,23 | 15,863573 | 6    | 10,2 | 4    | 5    | 18,76468 | 4,503523 |   |
| 1,27 | 16,740033 | 5    | 9    | 6    | 6,8  | 19,525   | 5,27175  |   |
| 1,19 | 17,65412  | 8    | 15   | 6    | 8,8  | 24,697   | 6,17425  |   |
| 1,25 | 19,2      | 12,8 | 16   | 6,8  | 10   | 26,06608 | 7,819824 |   |
| 1,21 | 14,343283 | 5,8  | 9    | 13   | 20,7 | 25,468   | 5,34828  |   |
| 1,29 | 17,426837 | 8    | 13   | 6,5  | 9    | 23,49175 | 6,812608 |   |
| 1,28 | 18,310547 | 7,5  | 14,8 | 10   | 23   | 27,48848 | 8,246544 |   |
| 1,16 | 14,863258 | 3    | 7    | 6,2  | 18   | 17,79088 | 3,558176 |   |
| 1,22 | 16,124698 | 6,8  | 10,2 | 4    | 4,8  | 18,76468 | 4,503523 |   |
| 1,22 | 13,437248 | 3    | 6,8  | 6    | 11   | 17,39408 | 3,478816 |   |
| 1,14 | 16,158818 | 5,8  | 9    | 4    | 6    | 17,593   | 3,69453  |   |
| 1,2  | 15,277778 | 7    | 10   | 4,5  | 9,3  | 19,05175 | 4,191385 |   |

|      |           |      |      |      |      |          |          |
|------|-----------|------|------|------|------|----------|----------|
| 1,24 | 15,608741 | 5    | 8,5  | 6    | 8    | 19,05175 | 4,57242  |
| 1,27 | 21,080042 | 12,2 | 15   | 4    | 6    | 23,077   | 7,84618  |
| 1,26 | 14,487276 | 6    | 8,7  | 14,8 | 22,8 | 26,57575 | 6,112423 |
| 1,22 | 16,124698 | 6,7  | 11   | 5    | 9    | 20,452   | 4,90848  |
| 1,27 | 16,740033 | 10,3 | 11,5 | 7    | 10,8 | 22,65575 | 6,117052 |
| -    | -         | -    | -    | 11   | 17   | -        | -        |
| 1,3  | 15,976331 | 6,5  | 13   | -    | -    | -        | -        |
| 1,18 | 15,081873 | 4,5  | 8    | 8    | 9,7  | 20,452   | 4,29492  |
| 1,32 | 16,64371  | 6,8  | 12   | 4,5  | 6    | 20,90575 | 6,062667 |
| 1,38 | 17,853392 | 4    | 8,5  | 7    | 18   | 19,99175 | 6,797195 |
| 1,3  | 16,568047 | 6    | 7,5  | 6,2  | 12,7 | 18,28103 | 5,118688 |
| 1,21 | 15,026296 | 3,8  | -    | 6,2  | 7    | -        | -        |
| 1,32 | 16,64371  | 6,8  | 6,8  | 6    | 7,8  | 17,39408 | 5,044283 |
| 1,33 | 14,6984   | 3    | 14   | 7    | 15,3 | 24,697   | 6,42122  |
| 1,32 | 14,921947 | 6,3  | 5    | 3    | 4    | 12,308   | 3,20008  |
| 1,25 | 16        | 9,2  | 11,2 | 8,3  | 16   | 23,49175 | 5,872938 |
| 1,23 | 15,863573 | 7    | 11   | 6    | 14,7 | 21,353   | 5,12472  |
| 1,23 | 17,185538 | 5    | 10   | 7    | 9    | 21,353   | 5,55178  |
| 1,24 | 13,657648 | 4    | 8    | 6    | 11   | 18,572   | 3,90012  |
| 1,27 | 16,120032 | 7    | 7    | 5    | 6    | 16,588   | 4,31288  |
| 1,3  | 14,201183 | 6,8  | 11,2 | 6    | 10   | 21,53008 | 5,167219 |
| 1,22 | 18,812147 | 12   | 9    | 6    | 12,5 | 19,525   | 5,467    |
| 1,21 | 15,709309 | 4    | 18,8 | 18   | 25   | 33,83888 | 7,782942 |
| 1,14 | 14,619883 | 6    | 7,8  | 4    | 8    | 16,38388 | 3,112937 |
| 1,27 | 15,500031 | 7    | 11   | 5    | 6    | 20,452   | 5,113    |
| 1,27 | 16,740033 | 11   | 15,8 | 8    | 13   | 26,79028 | 7,233376 |
| 1,33 | 15,263723 | 6    | 9    | 15   | 18,7 | 26,932   | 7,27164  |
| 1,33 | 16,394369 | 6,3  | 11   | 5    | 9    | 20,452   | 5,93108  |
| 1,34 | 17,821341 | 7,5  | 10,5 | 7    | 16   | 21,79375 | 6,974    |
| 1,23 | 12,558662 | 3,2  | 5    | 7    | 12,7 | 16,588   | 3,15172  |
| 1,22 | 16,124698 | 6,8  | 11,2 | 3    | 4    | 18,76468 | 4,503523 |
| 1,25 | 14,72     | 4,5  | 8,8  | 7,7  | 13   | 20,90575 | 4,808323 |
| -    | -         | -    | -    | 5,8  | 9    | -        | -        |
| 1,19 | 15,535626 | 6,2  | 10   | -    | -    | -        | -        |
| 1,31 | 16,316065 | 10,8 | 13   | 6,8  | 9    | 23,73748 | 6,646494 |
| 1,24 | 14,958377 | 4,2  | 6,8  | 6,8  | 11   | 18,18352 | 4,18221  |
| 1,27 | 13,640027 | 3    | 5    | 4    | 6,5  | 13,417   | 2,95174  |
| 1,39 | 17,597433 | 9,2  | 13   | 4    | 4    | 21,353   | 7,26002  |
| 1,21 | 14,343283 | 4,2  | 7    | 7    | 18,7 | 18,572   | 3,90012  |
| 1,2  | 15,972222 | 6    | 8,2  | 6,8  | 8    | 19,525   | 4,49075  |
| 1,23 | 14,541609 | 5,5  | 8,8  | 7    | 9    | 20,26868 | 4,45911  |
| 1,22 | 16,124698 | 6    | 9    | 7    | 9    | 20,452   | 4,90848  |
| 1,25 | 15,36     | 6,5  | 9,2  | 7    | 11   | 20,63428 | 4,952227 |
| 1,23 | 17,185538 | 8    | 13   | 5,5  | 7    | 22,65575 | 5,890495 |
| 1,23 | 15,202591 | 3,5  | 7    | 8    | 11,7 | 19,525   | 4,49075  |
| 1,26 | 17,636684 | 8    | 13   | 5    | 5    | 22,228   | 6,22384  |
| 1,24 | 14,958377 | 5,2  | 9    | 5    | 12,2 | 18,572   | 4,27156  |
| 1,24 | 19,510926 | 8,3  | 12   | 7,2  | 7,2  | 23,24368 | 6,973104 |
| 1,26 | 15,117158 | 5,2  | 8,2  | 8    | 20   | 20,63428 | 4,952227 |
| -    | -         | -    | -    | 6    | 8    | -        | -        |



| FFM      | SC attendance | Weight status | Educational level |
|----------|---------------|---------------|-------------------|
| 18,23938 | 2             | 1             | 2                 |
| 17,16098 | 1             | 1             | 1                 |
| 18,76303 | 1             | 1             | 1                 |
| 18,69302 | 1             | 1             | 1                 |
| 19,94587 | 1             | 1             | 1                 |
| 19,57878 | 1             | 1             | 2                 |
| 22,23    | 1             | 1             | 1                 |
| 17,91416 | 1             | 1             | 1                 |
| 17,16699 | 2             | 1             | 1                 |
| 20,26568 | 1             | 1             | 1                 |
| 19,13805 | 2             | 1             | 1                 |
| 14,84259 | 1             | 1             | 1                 |
| 26,27414 | 1             | 2             | 1                 |
| 18,04808 | 1             | 1             | 2                 |
| 21,55563 | 1             | 1             | 1                 |
| 17,44049 | 1             | 1             | 1                 |
| 18,12978 | 2             | 1             | 1                 |
| 19,20198 | 1             | 1             | 2                 |
| 17,94731 | 1             | 1             | 1                 |
| 18,64446 | 1             | 2             | 2                 |
| 19,30258 | 1             | 1 -           |                   |
| 18,12978 | 1             | 1             | 1                 |
| 17,60182 | 1             | 1             | 1                 |
| 17,14056 | 1             | 1             | 1                 |
| 20,853   | 1             | 1             | 1                 |
| 18,84028 | 1             | 1             | 1                 |
| 20,97252 | 1             | 1 -           |                   |
| 21,37437 | 1             | 1             | 1                 |
| 18,36198 | 1             | 1             | 1                 |
| 16,2856  | 1             | 1             | 1                 |
| 22,46958 | 1             | 2             | 1                 |
| 16,44182 | 1             | 1             | 1                 |
| 22,50404 | 1             | 1             | 1                 |
| 19,54272 | 1             | 1             | 1                 |
| 25,80806 | 1             | 2             | 1                 |
| 21,55563 | 2             | 1             | 1                 |
| 16,4814  | 1             | 1             | 2                 |
| 21,77616 | 1             | 1             | 1                 |
| 20,66036 | 1             | 2 -           |                   |
| 17,30234 | 1             | 1             | 1                 |
| 18,81    | 1             | 1             | 1                 |
| 23,08932 | 1             | 2             | 2                 |
| 19,4942  | 1             | 1             | 1                 |
| 23,1695  | 1             | 2             | 2                 |
| 18,83278 | 1             | 1             | 1                 |
| 19,72864 | 1             | 1             | 1                 |
| 19,54272 | 1             | 1             | 1                 |
| 19,93283 | 1             | 1             | 1                 |
| 16,095   | 2             | 1             | 1                 |

|          |     |     |   |
|----------|-----|-----|---|
| 19,86351 | 1   | 1   | 1 |
| 24,70539 | 1   | 2   | 2 |
| 16,43051 | 2   | 1   | 2 |
| 17,51652 | 1   | 1   | 1 |
| -        | 1 - |     | 1 |
| 17,41031 | 2   | 1   | 1 |
| 23,70155 | 1   | 2   | 1 |
| 21,50531 | 2   | 1 - |   |
| 16,78485 | 2   | 1   | 1 |
| 24,1425  | 1   | 1   | 1 |
| 14,6265  | 1   | 1   | 1 |
| 21,04513 | 1   | 1   | 1 |
| 21,17128 | 1   | 1   | 1 |
| 19,77768 | 2   | 1   | 1 |
| -        | 1 - |     | 2 |
| 16,38039 | 1   | 1   | 2 |
| 19,32632 | 1   | 1   | 1 |
| 23,49879 | 2   | 1   | 1 |
| 20,357   | 1   | 1 - |   |
| 16,36843 | 1   | 1   | 1 |
| 26,03917 | 1   | 2   | 1 |
| -        | 2 - | -   |   |
| 20,68248 | 1   | 1   | 1 |
| 21,19551 | 1   | 2   | 1 |
| 19,38196 | 1   | 1   | 1 |
| 19,09158 | 1   | 1   | 1 |
| -        | 1 - |     | 1 |
| 20,26568 | 1   | 2   | 1 |
| -        | 2 - |     | 1 |
| -        | 1 - |     | 2 |
| -        | 1 - |     | 2 |
| 19,77768 | 1   | 1   | 1 |
| 22,14639 | 1   | 1   | 1 |
| 24,45205 | 1   | 2   | 1 |
| 17,50056 | 1   | 1   | 1 |
| 22,50404 | 1   | 2   | 1 |
| 22,94143 | 1   | 1   | 1 |
| 18,1733  | 1   | 1   | 2 |
| 21,75367 | 1   | 1   | 1 |
| 21,37637 | 2   | 1   | 1 |
| 18,68412 | 1   | 1   | 1 |
| 20,57149 | 2   | 1 - |   |
| -        | 1 - |     | 1 |
| 15,94561 | 2   | 1   | 2 |
| 24,6582  | 1   | 2   | 1 |
| 18,81    | 1   | 1   | 1 |
| 15,19974 | 2   | 1   | 1 |
| 16,47868 | 1   | 1   | 1 |
| 17,30547 | 1   | 1   | 1 |
| 19,30258 | 1   | 1 - |   |

|          |     |     |   |
|----------|-----|-----|---|
| 18,23938 | 1   | 1   | 1 |
| 21,68712 | 2   | 1 - |   |
| 17,3166  | 1   | 1   | 1 |
| 24,66903 | 1   | 2   | 1 |
| 17,1     | 2   | 1   | 1 |
| 27,69228 | 1   | 2   | 1 |
| 17,83339 | 2   | 1   | 1 |
| 17,503   | 2   | 1   | 1 |
| 21,26279 | 1   | 1   | 1 |
| 21,37437 | 1   | 1   | 1 |
| 22,91952 | 1   | 2   | 1 |
| 16,22449 | 2   | 1   | 2 |
| 23,41251 | 2   | 1   | 2 |
| 23,89892 | 2   | 2   | 2 |
| 18,35064 | 1   | 1   | 2 |
| 19,54272 | 2   | 1 - |   |
| 27,5025  | 2   | 2   | 1 |
| 24,25592 | 1   | 1   | 1 |
| 20,5034  | 1   | 1   | 2 |
| 22,3036  | 1   | 1   | 1 |
| 21,26279 | 2   | 2   | 1 |
| 19,33904 | 1   | 1   | 1 |
| -        | 2 - |     | 1 |
| 17,0573  | 1   | 1   | 2 |
| -        | 1 - |     | 1 |
| 20,70848 | 1   | 2   | 1 |
| 17,50056 | 1   | 1   | 2 |
| -        | 2 - | -   |   |
| 22,23702 | 1   | 2   | 1 |
| 17,955   | 1   | 1   | 1 |
| 20,01888 | 1   | 1   | 2 |
| 22,31946 | 2   | 2   | 1 |
| 15,63474 | 2   | 1   | 2 |
| 17,14056 | 2   | 1   | 1 |
| 19,025   | 1   | 1 - |   |
| 20,70147 | 1   | 1   | 1 |
| 18,95361 | 1 - |     | 1 |
| 18,46152 | 2   | 1   | 1 |
| 20,22072 | 1   | 1   | 2 |
| 23,46188 | 1   | 1   | 1 |
| -        | 2 - |     | 2 |
| 18,46613 | 1   | 1   | 1 |
| 19,09152 | 1   | 1   | 1 |
| 21,0218  | 1   | 1   | 1 |
| 18,53164 | 1   | 1   | 1 |
| 18,65367 | 2   | 1 - |   |
| 18,85719 | 1   | 1   | 1 |
| 18,69302 | 1   | 1   | 1 |
| 22,51158 | 1   | 1   | 1 |
| -        | 1 - |     | 1 |

|          |     |     |   |
|----------|-----|-----|---|
| -        | 2 - | -   |   |
| 20,16471 | 2   | 1 - |   |
| 18,15035 | 2   | 1   | 2 |
| 18,35064 | 2   | 1   | 2 |
| 21,98556 | 1   | 1   | 1 |
| -        | 1 - | -   |   |
| -        | 1   | 1   | 1 |
| 18,38176 | 2   | 1 - |   |
| -        | 2 - | -   |   |
| -        | 1   | 1   | 1 |
| 20,67644 | 1   | 1   | 1 |
| 22,58579 | 1   | 2   | 1 |
| 22,32477 | 2   | 1 - |   |
| -        | 2 - |     | 1 |
| -        | 1   | 1   | 1 |
| 20,72656 | 1   | 1   | 2 |
| 26,35495 | 2   | 2   | 1 |
| -        | 1 - |     | 2 |
| -        | 2   | 1 - |   |
| 20,11875 | 1   | 1   | 1 |
| 15,8097  | 1   | 1   | 1 |
| -        | 2 - |     | 1 |
| -        | 2   | 1 - |   |
| 17,14056 | 1   | 1   | 1 |
| 24,60337 | 2   | 2 - |   |
| 20,44822 | 2   | 1   | 2 |
| 15,38017 | 2   | 1 - |   |
| -        | 1 - | -   |   |
| -        | 2   | 1   | 2 |
| 22,02217 | 2   | 2   | 2 |
| 23,41721 | 2   | 1   | 2 |
| 23,01606 | 1   | 2   | 1 |
| 17,09988 | 1   | 1 - |   |
| 14,51943 | 1   | 1   | 1 |
| 16,6824  | 1   | 1   | 1 |
| 19,13552 | 1   | 1   | 2 |
| 22,03077 | 2   | 2   | 2 |
| 15,49944 | 2   | 1   | 1 |
| 19,49648 | 2   | 1   | 2 |
| 21,72825 | 1   | 1   | 1 |
| 18,82575 | 1   | 1   | 1 |
| 22,18018 | 1   | 2   | 2 |
| 15,65172 | 1   | 1   | 1 |
| 22,18739 | 1   | 1   | 1 |
| 21,75346 | 2   | 2   | 1 |
| 16,44182 | 2   | 1   | 1 |
| 19,49648 | 1   | 1   | 1 |
| 16,52118 | 1   | 1   | 1 |
| 17,30547 | 1   | 1   | 1 |
| 17,80862 | 2   | 1   | 1 |

|          |     |     |   |
|----------|-----|-----|---|
| 19,42758 | 2   | 1   | 1 |
| 26,15382 | 1   | 2   | 1 |
| 16,88758 | 2   | 1   | 2 |
| 19,09152 | 1   | 1   | 2 |
| 20,88295 | 1   | 1   | 1 |
| -        | 1 - |     | 2 |
| -        | 2   | 1   | 2 |
| 16,70508 | 1   | 1   | 1 |
| 22,93733 | 1   | 1   | 1 |
| 27,20281 | 1   | 1   | 2 |
| 22,88131 | 1   | 1   | 1 |
| -        | 2   | 1   | 1 |
| 23,95572 | 2   | 1   | 2 |
| 19,57878 | 2   | 1   | 1 |
| 22,79992 | 1   | 1   | 2 |
| 19,12706 | 1   | 1   | 1 |
| 18,87528 | 1   | 1   | 1 |
| 20,44822 | 1   | 1   | 1 |
| 17,09988 | 1   | 1   | 2 |
| 21,68712 | 1   | 1   | 1 |
| 18,83278 | 1   | 1   | 1 |
| 22,533   | 1   | 2   | 2 |
| 15,21706 | 2   | 1 - |   |
| 15,88706 | 1   | 1   | 1 |
| 19,887   | 1   | 1   | 2 |
| 19,76662 | 2   | 1   | 2 |
| 19,72836 | 1   | 1   | 1 |
| 23,06892 | 1   | 1   | 1 |
| 25,026   | 2   | 1   | 1 |
| 15,84828 | 2   | 1   | 1 |
| 19,49648 | 1   | 1   | 1 |
| 18,19168 | 1   | 1   | 1 |
| -        | 2 - | -   |   |
| -        | 1   | 1   | 1 |
| 21,35351 | 2   | 1   | 1 |
| 18,81779 | 1 - |     | 1 |
| 19,04826 | 1   | 1   | 1 |
| 26,73998 | 1   | 2   | 1 |
| 17,09988 | 2   | 1   | 1 |
| 18,50925 | 2   | 1   | 1 |
| 17,54089 | 2   | 1   | 1 |
| 19,09152 | 2   | 1   | 1 |
| 19,04777 | 2   | 1   | 1 |
| 20,10951 | 1   | 1   | 1 |
| 18,50925 | 1   | 1   | 2 |
| 21,77616 | 1   | 2   | 1 |
| 18,72844 | 1   | 1   | 1 |
| 23,0269  | 1   | 2   | 2 |
| 19,04777 | 2   | 1   | 2 |
| -        | 1 - |     | 2 |

|            |     |     |   |
|------------|-----|-----|---|
| -          | 1   | 1   | 1 |
| 21,93354   | 1   | 1   | 1 |
| 17,50056   | 2   | 1   | 1 |
| 21,58179   | 1   | 1   | 1 |
| 16,92306   | 1   | 1   | 1 |
| 16,29603   | 2   | 1   | 1 |
| 21,17128   | 1   | 1   | 2 |
| 20,47134   | 1   | 1   | 1 |
| 23,07396   | 1   | 1   | 1 |
| 21,11075   | 1   | 1 - |   |
| -          | 2 - | -   |   |
| -          | 2   | 1   | 1 |
| 17,91416   | 1   | 1   | 2 |
| 23,73      | 2   | 2 - |   |
| 14,87618   | 1   | 1   | 1 |
| 19,314     | 1   | 1   | 1 |
| 26,62685   | 1   | 1   | 1 |
| 14,35164   | 1   | 1   | 2 |
| 19,04777   | 2   | 1   | 1 |
| 21,53844   | 2   | 1 - |   |
| 18,70678   | 2   | 1 - |   |
| 23,17578   | 2   | 2 - |   |
| 16,23314   | 1   | 1 - |   |
| 22,87397   | 2   | 2 - |   |
| 20,66036   | 2   | 2 - |   |
| 16,39704   | 2   | 1   | 2 |
| -          | 2 - | -   |   |
| -          | 1   | 1   | 1 |
| 22,75628   | 2   | 1 - |   |
| -          | -   | -   |   |
| -          | -   | -   | 2 |
| -          | 1   | 1   | 1 |
| 21,17128   | 2   | 1   | 2 |
| 16,52118 - |     | 1 - |   |
| -          | -   | -   |   |
| -          | -   | -   |   |

S1Appendix file legend

Dichotomized variables in dataset:

Gender: 1 – boy 2 – girl

MVPA norm: 1 – yes 2 – no

SC attendance: 1 – yes 2 – no

Weight status: 1 – normal weight 2 – overweight

Educational level: 1 – university degree 2 – no university degree
